# Supplementary material
Source: Springer Nature journal article supplement (https://www.springermedizin.de/resource/supplementary/12885_2013_4714_MOESM1_ESM.pdf/9467112)

A

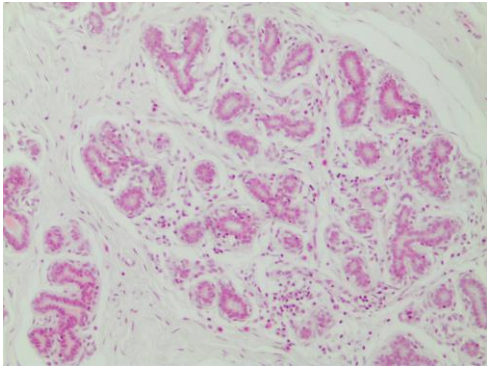

B

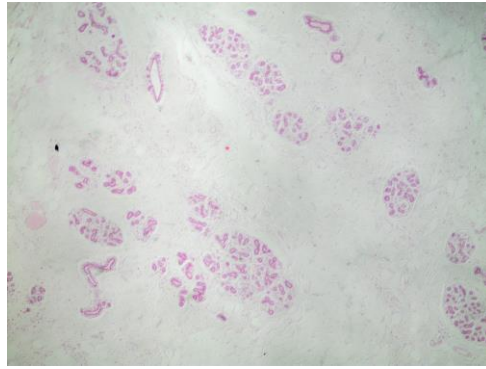

C

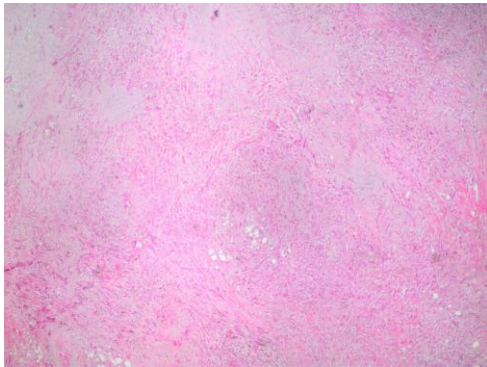

D

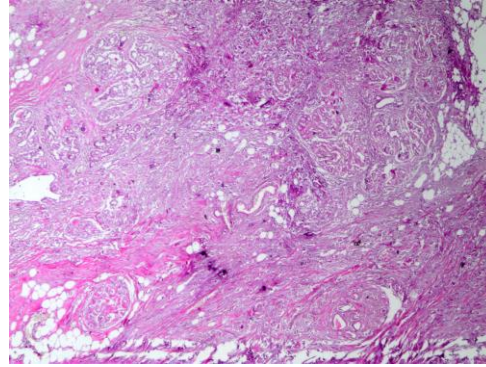

E

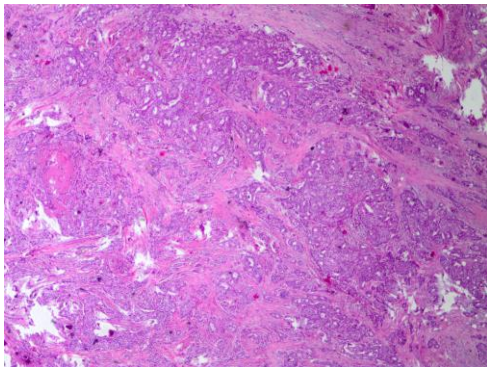

F

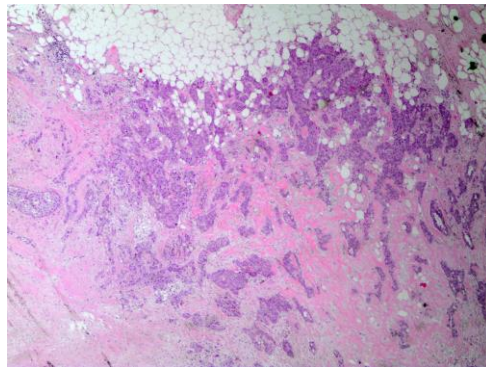

Supplement: MOESM1 [file 9467112]
